# Supplementary material
Source: Springer Nature journal article supplement (https://www.springermedizin.de/resource/supplementary/12874_2011_700_MOESM2_ESM.pdf/9432952)

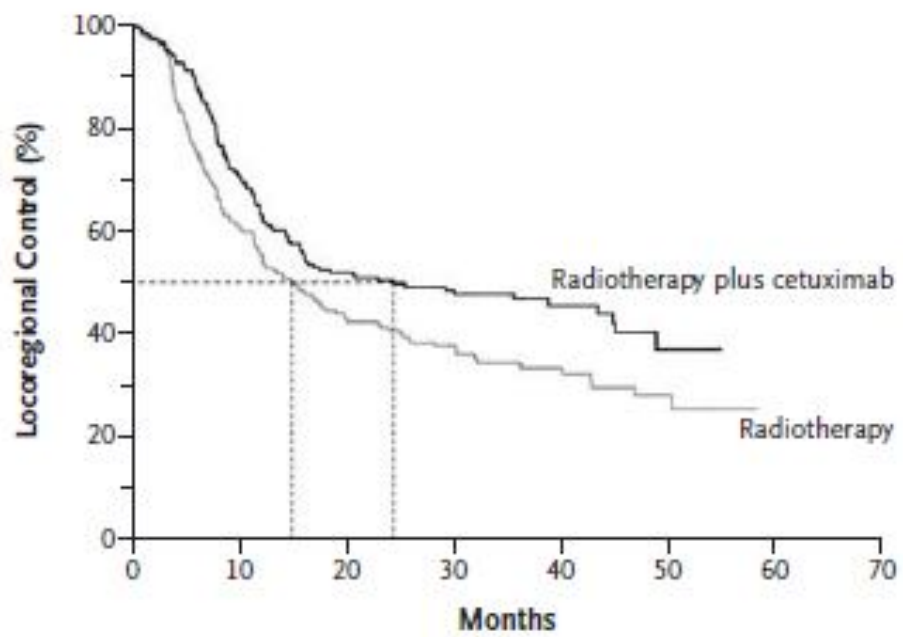

**No. at Risk**

|                             |     |     |     |    |    |    |
|-----------------------------|-----|-----|-----|----|----|----|
| Radiotherapy                | 213 | 122 | 80  | 51 | 30 | 10 |
| Radiotherapy plus cetuximab | 211 | 143 | 101 | 66 | 35 | 9  |

Supplement: MOESM2 [file 9432952]
